# Supplementary material for: The Effect of Irrigation and Humic Acid on the Plant Yield and Quality of Sweet Basil (Ocimum basilicum L.) with Mulching Application under Semi-Arid Ecological Conditions
Source: MDPI journal article supplement (doi:10.3390/plants12071522), 2023-03-31
Supplement: s1 [file s1]

**Supplementary Table S1.** Analysis of variance and mean values of the examined characteristics of *Ocimum basilicum* L. cultivated under different IRL and HAD conditions (2016) with SM.

|                  | PH       | NB              | FHY       | DHY    | DLY     | CV       | EOR  | EOY    | PR    |
|------------------|----------|-----------------|-----------|--------|---------|----------|------|--------|-------|
| IRL              |          |                 |           |        |         |          |      |        |       |
| IR 100           | 38.16 a  | 11.31 a         | 8639.0 a  | 1264.1 | 880.8 a | 43.73    | 0.45 | 3.9 ab | 22.15 |
| IR 75            | 39.22 a  | 10.93 a         | 8726.7 a  | 1236.5 | 881.7 a | 42.89    | 0.53 | 4.6 a  | 22.48 |
| IR 50            | 38.00 a  | 10.81 a         | 8335.2 ab | 1178.0 | 829.4 a | 45.75    | 0.49 | 4.0 a  | 23.02 |
| IR 25            | 36.14 b  | 9.54 b          | 7296.3 b  | 1031.7 | 732.9 b | 45.20    | 0.45 | 3.3 b  | 22.61 |
| HAD              |          |                 |           |        |         |          |      |        |       |
| HA 0             | 37.55 b  | 10.58           | 7931.4 b  | 1146.3 | 791.4   | 45.19 ab | 0.47 | 3.8    | 22.65 |
| HA 10            | 36.80 b  | 10.73           | 8165.8 b  | 1164.8 | 819.2   | 43.24 c  | 0.51 | 4.1    | 22.69 |
| HA 20            | 38.10 ab | 10.74           | 8319.5 ab | 1168.8 | 830.5   | 45.42 a  | 0.46 | 3.9    | 22.43 |
| HA 40            | 39.07 a  | 10.54           | 8580.5 a  | 1230.5 | 883.6   | 43.73 bc | 0.47 | 4.1    | 22.48 |
| Means            | 37.88    | 10.65           | 8249.2    | 1177.6 | 831.2   | 44.39    | 0.48 | 3.9    | 22.56 |
| ANOVA            |          |                 |           |        |         |          |      |        |       |
| IRL <sup>1</sup> | **       | *               | **        | ns     | *       | ns       | ns   | *      | ns    |
| HAD <sup>2</sup> | *        | ns <sup>3</sup> | *         | ns     | ns      | *        | ns   | ns     | ns    |
| HADx IRL         | *        | ns              | *         | ns     | ns      | ns       | ns   | ns     | **    |

PH: Plant Height (cm); NB: Number of Branches plant<sup>-1</sup> ; FHY: Fresh Herb Yield (kg ha<sup>-1</sup>); DHY: Dry Herb Yield (kg ha<sup>-1</sup>); DLY: Dry Leaf Yield (kg ha<sup>-1</sup>); CV: Chlorophyll Value (SPAD); EOR: Essential Oil Ratio (%); EOY: Essential Oil Yield (L ha<sup>-1</sup>); PR: Protein Ratio (%) <sup>1</sup>: Irrigation Levels, <sup>2</sup>: Humic Acid Doses, <sup>3</sup>:non-significant, IRL 100=100 % FC; IRL 75=75 % FC; IRL 50=50 % FC; IRL 25=25 % FC; HA 0=0.0 Lha<sup>-1</sup> ; HA 10=10.0 Lha<sup>-1</sup> ; HA 20=20.0 Lha<sup>-1</sup> ;HA 40=40.0 Lha<sup>-1</sup>  
<sup>3</sup>: non-significant; \* $p \leq 0.05$ ; \*\* $p \leq 0.01$ .
